# Supplementary material for: Active Component of Danshen (Salvia miltiorrhizaBunge), Tanshinone I, Attenuates Lung Tumorigenesis via Inhibitions of VEGF, Cyclin A, and Cyclin B Expressions
Source: Hindawi journal article supplement (doi:10.1155/2013/319247), 2013-01-01
Supplement: f1 [file 319247.f1.pdf]

## Supplementary Figure S1

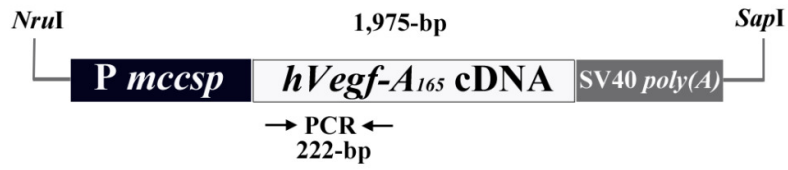

(a)

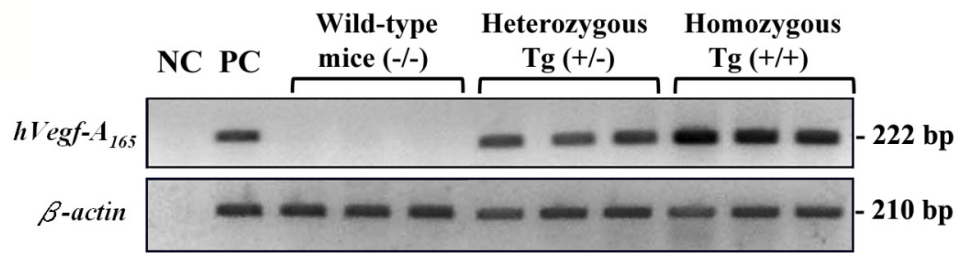

(b)

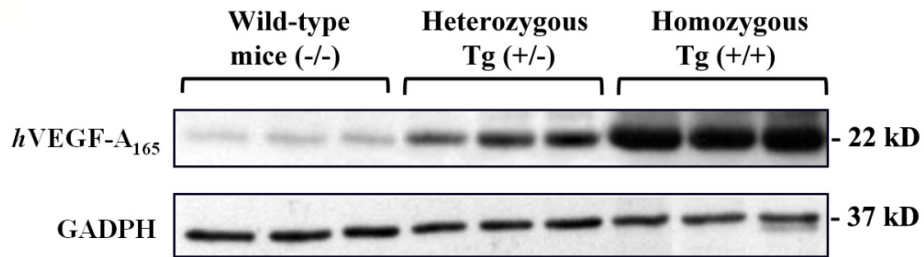

(c)
